# Supplementary material
Source: PubMed Central journal article supplement (PMC4438446)
Supplement: supp_eru471_jexbot133199_file001.pdf [file supp_eru471_jexbot133199_file001.pdf]

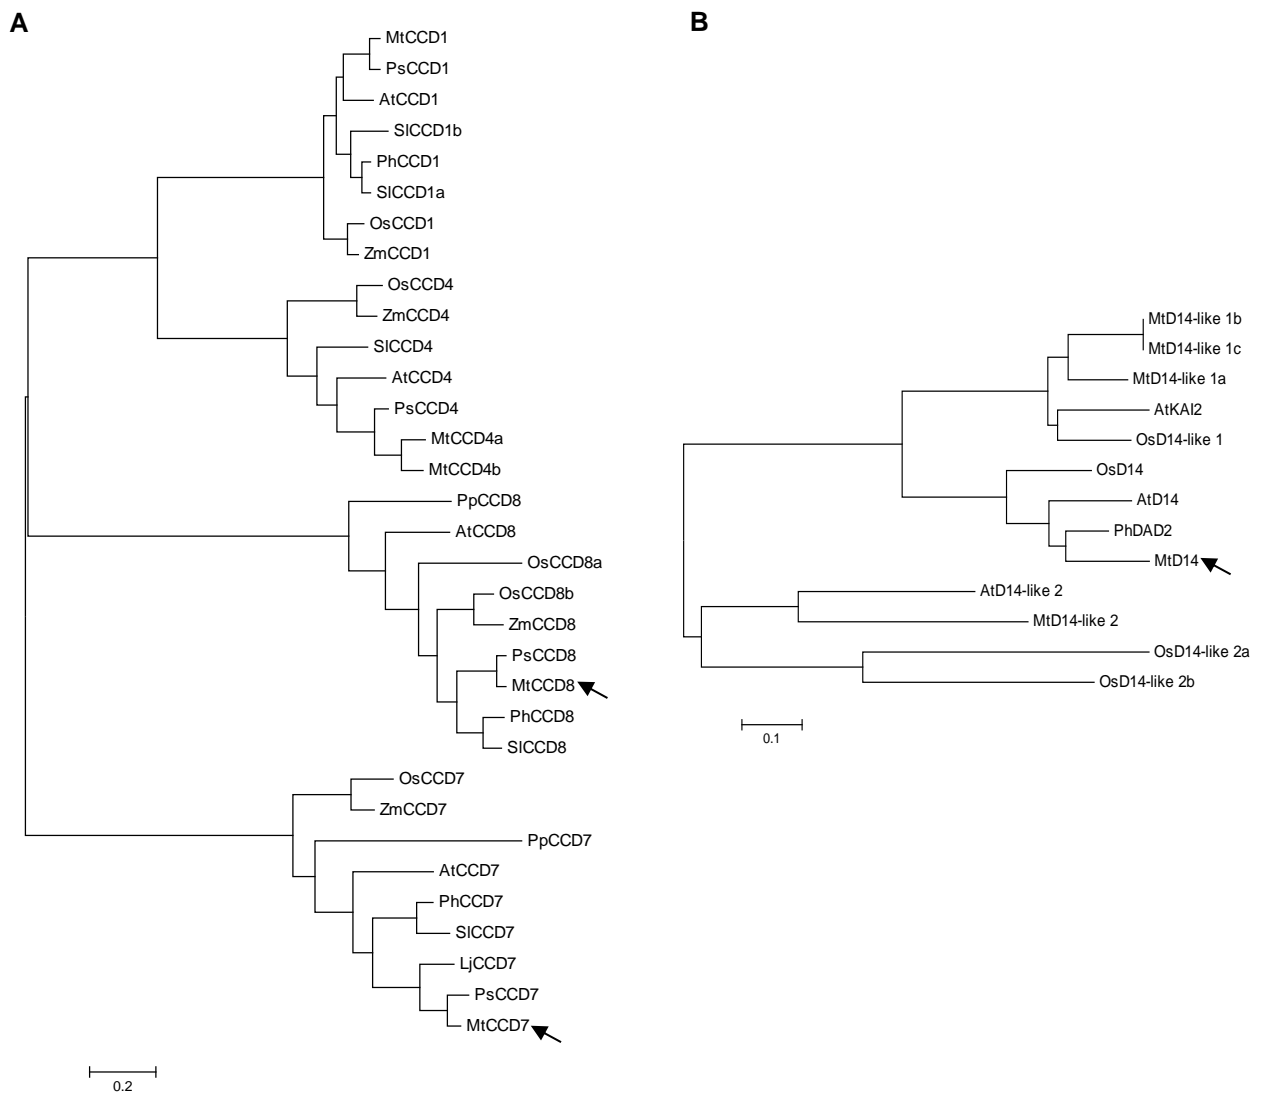

## Supplementary Figure S1

### Phylogeny of strigolactone biosynthesis and response genes.

A. Maximum-likelihood tree of *CCD* genes. *CCD7* and *CCD8* isoforms are involved in strigolactone synthesis.

B. Maximum-likelihood tree of *D14* and *D14-like* genes. *D14* proteins are involved in strigolactone perception.

The *M. truncatula* (Mt) genes considered in this study are indicated by arrows. At: *Arabidopsis thaliana*; Lj: *Lotus japonicus*; Os: *Oryza sativa*; Ph: *Petunia hybrida*; Pp: *Physcomitrella patens*; Ps: *Pisum sativum*; Sl: *Solanum lycopersicum*; Zm: *Zea mays*. Accession numbers are listed in Supplementary Table 1.

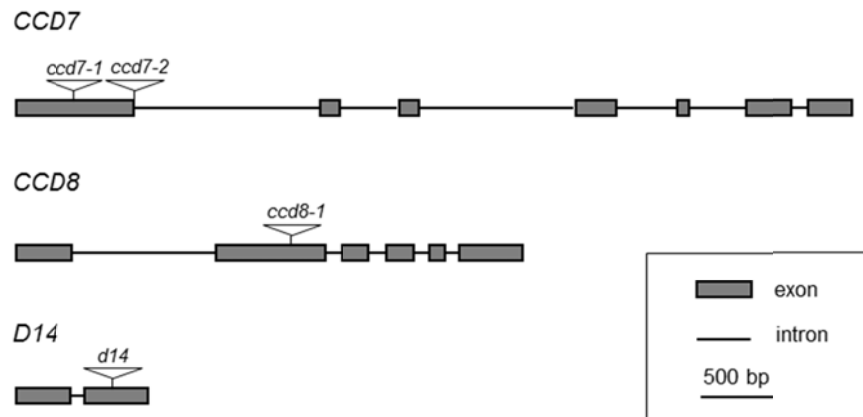

## Supplementary Figure S2

### Strigolactone insertional mutant alleles used in this study.

Position of *Tnt1* transposon insertion in *ccd7*, *ccd8* and *d14* mutant alleles. *Tnt1* presence and position were confirmed by PCR and sequencing.

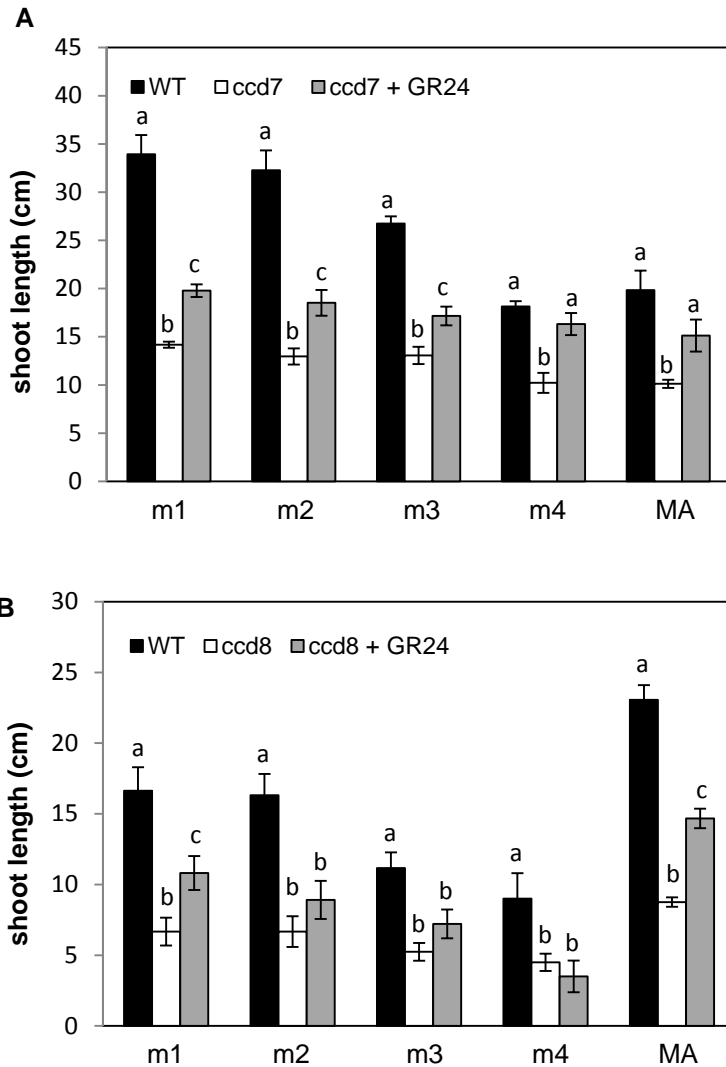

### Supplementary Figure S3

#### Exogenous strigolactone partly restores shoot elongation in *ccd7* and *ccd8* mutants.

Shoot lengths of the first axes (emerging from metamers m1 to m4) and of the main axis (MA) measured after 40 days of growth. Mutants (A: *ccd7-2*; B: *ccd8-1*) were treated or not with  $10^{-5}$  M GR24 applied at the shoot apex. Values correspond to the mean  $\pm$  s.e.m. of 5-6 plants per genotype. Statistical analysis was performed independently for each axis. For a given axis, different letters indicate statistically significant differences according to one-way ANOVA followed by Fisher's LSD test.

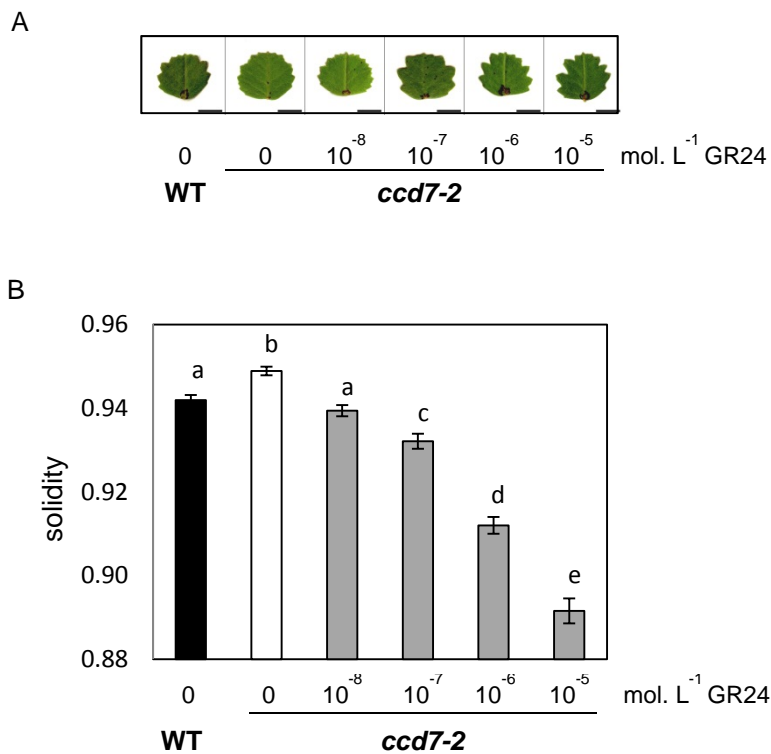

### Supplementary Figure S4

#### Leaflet serration phenotype of *ccd7-2* mutants.

GR24 was applied to the shoot tip at the indicated concentrations.

A. Scanned images of one representative leaflet in each condition. Representative leaflets with a solidity value equal to the average solidity of all leaflets in this condition were selected. Bar = 5 mm.

B. Solidity values for WT and *ccd7-2* mutant plants, treated or not with GR24. Values correspond to the mean  $\pm$  s.e.m. (n= 74 to 114 leaflets for each condition). Different letters indicate statistically significant differences according to Mann-Whitney's test ( $P < 0.05$  after Bonferroni adjustment).

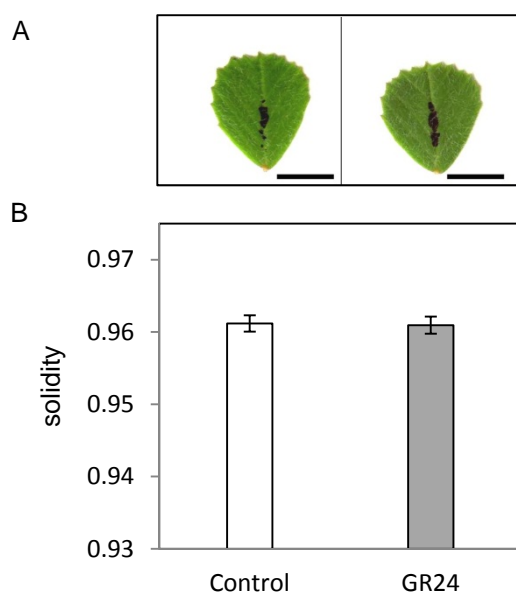

### Supplementary Figure S5

#### Effect of GR24 on leaflet serrations in *M. truncatula* ecotype Jemalong A17.

Plants were treated with  $10^{-5}$  mol.L<sup>-1</sup> GR24 or the solvent alone (control).

A. Scanned images of one representative leaflet in each condition. Bar = 5 mm.

B. Solidity values. Values correspond to the mean  $\pm$  s.e.m. (n= 56 to 75 leaflets per condition). No statistically significant difference between control and treated plants was found according to unequal variance t test.

| Species                      | Accession number | Gene name     |
|------------------------------|------------------|---------------|
| <i>Medicago truncatula</i>   | XM_003622507     | MtCCD7        |
| <i>Medicago truncatula</i>   | XM_003603562     | MtCCD8        |
| <i>Medicago truncatula</i>   | FM204879         | MtCCD1        |
| <i>Medicago truncatula</i>   | AES95418         | MtCCD4a       |
| <i>Medicago truncatula</i>   | AES95417         | MtCCD4b       |
| <i>Medicago truncatula</i>   | XM_003589038     | MtD14         |
| <i>Medicago truncatula</i>   | AES90654         | MtD14-like 1a |
| <i>Medicago truncatula</i>   | AES94592         | MtD14-like 1b |
| <i>Medicago truncatula</i>   | AES67371         | MtD14-like 1c |
| <i>Medicago truncatula</i>   | AES76757         | MtD14-like 2  |
| <i>Arabidopsis thaliana</i>  | Q7XJM2           | AtCCD7        |
| <i>Arabidopsis thaliana</i>  | Q8VY26           | AtCCD8        |
| <i>Arabidopsis thaliana</i>  | O65572           | AtCCD1        |
| <i>Arabidopsis thaliana</i>  | O49675           | AtCCD4        |
| <i>Arabidopsis thaliana</i>  | NP_566220        | AtD14         |
| <i>Arabidopsis thaliana</i>  | Q9SZU7           | AtKAI2        |
| <i>Arabidopsis thaliana</i>  | NP_189085        | AtD14-like 2  |
| <i>Pisum sativum</i>         | ABD67496         | PsCCD7        |
| <i>Pisum sativum</i>         | AAS66907         | PsCCD8        |
| <i>Pisum sativum</i>         | BAC10552         | PsCCD4        |
| <i>Pisum sativum</i>         | AB080191         | PsCCD1        |
| <i>Oryza sativa</i>          | Q7XU29           | OsCCD7        |
| <i>Oryza sativa</i>          | Q93VD5           | OsCCD8a       |
| <i>Oryza sativa</i>          | Q8LIY8           | OsCCD8b       |
| <i>Oryza sativa</i>          | BAF30414         | OsCCD1        |
| <i>Oryza sativa</i>          | NP_001047858     | OsCCD4        |
| <i>Oryza sativa</i>          | Q10QA5           | OsD14         |
| <i>Oryza sativa</i>          | NP_001050445     | OsD14-like 1  |
| <i>Oryza sativa</i>          | NP_001056487     | OsD14-like 2a |
| <i>Oryza sativa</i>          | NP_001043470     | OsD14-like 2b |
| <i>Petunia hybrida</i>       | ACY01408         | PhCCD7        |
| <i>Petunia hybrida</i>       | AAW59435         | PhCCD8        |
| <i>Petunia hybrida</i>       | AAT68189         | PhCCD1        |
| <i>Petunia hybrida</i>       | J9U5U9           | PhDAD2        |
| <i>Solanum lycopersicum</i>  | ACY39883         | SICCD7        |
| <i>Solanum lycopersicum</i>  | AEH96363         | SICCD8        |
| <i>Solanum lycopersicum</i>  | AAT68187         | SICCD1a       |
| <i>Solanum lycopersicum</i>  | AAT68188         | SICCD1b       |
| <i>Solanum lycopersicum</i>  | XP_004246004     | SICCD4        |
| <i>Zea mays</i>              | DAA36538         | ZmCCD7        |
| <i>Zea mays</i>              | NP_001183929     | ZmCCD8        |
| <i>Zea mays</i>              | AFW89638         | ZmCCD1        |
| <i>Zea mays</i>              | AFW63527         | ZmCCD4        |
| <i>Physcomitrella patens</i> | XP_001754597     | PpCCD7        |
| <i>Physcomitrella patens</i> | XP_00175472      | PpCCD8        |
| <i>Lotus japonicus</i>       | ADM88552         | LjCCD7        |

### Supplementary Table S1

Accession numbers of genes used in the phylogenetic analysis.
